# Supplementary material for: Spectral Tuning Mechanism of Primate Blue-sensitive Visual Pigment Elucidated by FTIR Spectroscopy
Source: PubMed Central journal article supplement (PMC5501831; doi:10.1038/s41598-017-05177-4), 2017-07-07

## SUPPLEMENTARY INFORMATION

### **Spectral Tuning Mechanism of Primate Blue-Sensitive Visual Pigment Elucidated by FTIR Spectroscopy**

Kota Katayama<sup>1,2,a</sup>, Yuki Nonaka<sup>1,a</sup>, Kei Tsutsui<sup>3</sup>, Hiroo Imai<sup>3</sup>, and Hideki Kandori<sup>\*,1,2</sup>

<sup>1</sup>Department of Life Science and Applied Chemistry, Nagoya Institute of Technology, Showa-ku, Nagoya 466-8555, Japan

<sup>2</sup>OptoBioTechnology Research Center, Nagoya Institute of Technology, Showa-ku, Nagoya 466-855, Japan

<sup>3</sup>Primate Research Institute, Kyoto University, Inuyama 484-8506, Japan

\*Corresponding authors: Department of Life Science and Applied Chemistry, Nagoya Institute of Technology, Showa-ku, Nagoya 466-8555, Japan. Phone and fax: 81-52-735-5207. E-mail: [kandori@nitech.ac.jp](mailto:kandori@nitech.ac.jp).

<sup>a</sup>These authors contributed equally to this work.

**Table 1**

| Table1: Frequency of HOOP bands (Table.1) |                                           |                          |                          |                                                  |                |
|-------------------------------------------|-------------------------------------------|--------------------------|--------------------------|--------------------------------------------------|----------------|
|                                           | (-) C <sub>11</sub> =C <sub>12</sub> HOOP | (+) C <sub>11</sub> HOOP | (+) C <sub>12</sub> HOOP | $\Delta$ (C <sub>11</sub> -C <sub>12</sub> HOOP) | S <sup>a</sup> |
| MB                                        | 961                                       | 928                      | 865                      | 63                                               | 0.00252        |
| MB Y265W                                  | 963                                       | 924                      | 865                      | 59                                               | 0.00190        |
| MRh W265Y                                 | 970                                       | 923                      | 857                      | 66                                               | 0.00299        |
| MRh                                       | 966                                       | 917                      | 857                      | 60                                               | 0.00238        |
| MG                                        | 973                                       | 907 <sup>b</sup>         | 848                      | 59                                               | 0.00540        |
| MR                                        | 973                                       | 906 <sup>c</sup>         | 847                      | 59                                               | 0.00516        |

<sup>a</sup> Sum of the intensity of negative bands from C<sub>11</sub>=C<sub>12</sub> HOOP

<sup>b</sup> Average of two positive bands (911cm<sup>-1</sup> and 903cm<sup>-1</sup>)

<sup>c</sup> Average of two positive bands (909cm<sup>-1</sup> and 903cm<sup>-1</sup>)

## Supplementary Figure legends

**Figure S1. Amino acid sequences of monkey blue, rhodopsin (bovine and monkey), monkey green, and monkey red.** (a) 26 amino acids within 5 Å from the retinal chromophore in the X-ray structure of bovine rhodopsin are shown. The amino acids are identical between bovine and monkey rhodopsins. The two key residues for monkey blue, Glu113 and Tyr265 are highlighted by red. The residue numbers are based on the bovine rhodopsin sequence. (b) Schematic representation of the 26 amino acid differences around 11-*cis*-retinal among each pigments.

**Figure S2. Light-induced difference FTIR and UV-visible absorption spectra of mutant proteins, and correlation between the retinal C=C stretching frequency and  $\lambda_{\max}$ .** (a) Light-induced difference FTIR spectra of MB, MB-Y265W, MRh-W265Y, MRh, MG and MR in the 1800-800  $\text{cm}^{-1}$  region at 77 K. One division of the y-axis corresponds to 0.0013 absorbance units. (b) Expanded spectra from (a) in the 1630-1450  $\text{cm}^{-1}$  region. One division of the y-axis corresponds to 0.0013 absorbance units. (c) UV-visible absorption spectra of MB ( $\lambda_{\max} = 417$  nm), MB-Y265W ( $\lambda_{\max} = 434$  nm), MRh-W265Y ( $\lambda_{\max} = 481$  nm), MRh ( $\lambda_{\max} = 499$  nm), MG ( $\lambda_{\max} = 530$  nm) and MR ( $\lambda_{\max} = 563$  nm). (d) Correlation of the unphotolyzed retinal C=C stretching frequencies of MB (1576  $\text{cm}^{-1}$ ), MB-Y265W (1566  $\text{cm}^{-1}$ ), MRh-W265Y (1564  $\text{cm}^{-1}$ ), MRh (1561  $\text{cm}^{-1}$ ), MG (1534  $\text{cm}^{-1}$ ) and MR (1526  $\text{cm}^{-1}$ ) from (b) with their absorption maxima from (c).

**Figure S3. Structural changes from rhodopsin (green) to bathorhodopsin (red), and representation around retinal binding pocket.** (a) Structural changes from rhodopsin (green) to batho-intermediate state, bathorhodopsin (red) are viewed from extracellular side. The double bond at the position C<sub>11</sub> and C<sub>12</sub> (C<sub>11</sub>=C<sub>12</sub>) is highlighted about highly distortion. (b) Part of the retinal binding pocket are viewed from helix VI, where the curvature along the polyene chain of retinal is emphasised, and side chain of W265 is facing towards atoms of C<sub>11</sub> and C<sub>12</sub>.

**Figure S4. HOOP band correlation diagrams for dark and batho-intermediate state among each pigments with their absorption maxima, and summary of the HOOP band frequencies of the batho-intermediate state.** (a) Correlation of the C<sub>11</sub>=C<sub>12</sub> HOOP band frequencies of different pigments in the dark state with their absorption maxima. (b) Correlation of the C<sub>11</sub> or C<sub>12</sub> HOOP band frequencies of different pigments in the batho-intermediate state with their absorption maxima. (c) Calculated area of C<sub>11</sub>=C<sub>12</sub> HOOP band of different pigments in the dark state with their absorption maxima. (d) Summary of the HOOP band frequencies of different pigments in the batho-intermediate state.

**Figure S5.** Light-induced difference FTIR of MB, MB-Y265W, MRh-W265Y and MRh in the 3400-3200  $\text{cm}^{-1}$  region at 77 K. One division of the y-axis corresponds to 0.0005 absorbance units.

**Figure S6.** Light-induced difference FTIR of MB (blue solid and dotted lines), MB-Y265W (light blue) and MB-E113D (magenta) in the 2730-2460  $\text{cm}^{-1}$  region at 77 K. One division of the y-axis corresponds to 0.00016 absorbance units.

**Figure S7.** Light-induced difference FTIR of MB, MB-Y265W, MRh-W265Y, MRh, MG and MR in the 3600-3380  $\text{cm}^{-1}$  region at 77 K. One division of the y-axis corresponds to 0.0005 absorbance units.

**Figure S8.** Light-induced difference FTIR of MB, MRh, MG and MR in the 2150-1930  $\text{cm}^{-1}$  region at 77 K. One division of the y-axis corresponds to 0.00004 absorbance units.

# Figure S1

(a)

|                      |   |           |          |     |          |            |          |          |          |           |          |          |          |          |          |          |          |          |    |          |
|----------------------|---|-----------|----------|-----|----------|------------|----------|----------|----------|-----------|----------|----------|----------|----------|----------|----------|----------|----------|----|----------|
|                      |   | 113       |          | 125 | 164      | 181        |          | 191      |          |           |          |          |          |          |          |          |          |          |    |          |
| monkey blue (417nm)  | : | <b>E</b>  | G        | ..  | G        | T          | ..       | G        | L        | ..        | G        | G        | E        | ...      | S        | C        | G        | P        | .. | W        |
| rhodopsin (499nm)    | : | E         | G        | ..  | A        | T          | ..       | G        | E        | ..        | L        | A        | E        | ...      | S        | C        | G        | I        | .. | Y        |
| monkey green (530nm) | : | E         | G        | ..  | V        | S          | ..       | G        | I        | ..        | L        | A        | H        | ...      | S        | C        | G        | P        | .. | V        |
| monkey red (563nm)   | : | <u>E</u>  | <u>G</u> | ..  | <u>V</u> | <u>S</u>   | ..       | <u>G</u> | <u>I</u> | ..        | <u>L</u> | <u>S</u> | <u>H</u> | ...      | <u>S</u> | <u>C</u> | <u>G</u> | <u>P</u> | .. | <u>V</u> |
|                      |   | Helix III |          |     |          |            | Helix IV |          |          | E-II loop |          |          |          |          |          |          |          |          |    |          |
|                      |   | 207       |          | 212 | 261      | <b>265</b> |          | 269      | 292      |           | 296      |          |          |          |          |          |          |          |    |          |
| monkey blue (417nm)  | : | L         | F        | ..  | C        | F          | F        | ...      | <b>Y</b> | ..        | Y        | A        | A        | F        | ..       | S        | K        |          |    |          |
| rhodopsin (499nm)    | : | M         | F        | ..  | H        | F          | F        | ...      | W        | ..        | Y        | A        | A        | F        | ..       | A        | K        |          |    |          |
| monkey green (530nm) | : | L         | M        | ..  | C        | C          | F        | ...      | W        | ..        | Y        | A        | A        | Y        | ..       | A        | K        |          |    |          |
| monkey red (563nm)   | : | <u>L</u>  | <u>M</u> | ..  | <u>C</u> | <u>C</u>   | <u>Y</u> | ...      | <u>W</u> | ..        | <u>Y</u> | <u>T</u> | <u>A</u> | <u>Y</u> | ..       | <u>A</u> | <u>K</u> |          |    |          |
|                      |   | Helix V   |          |     |          | Helix VI   |          |          |          | Helix VII |          |          |          |          |          |          |          |          |    |          |

(b)

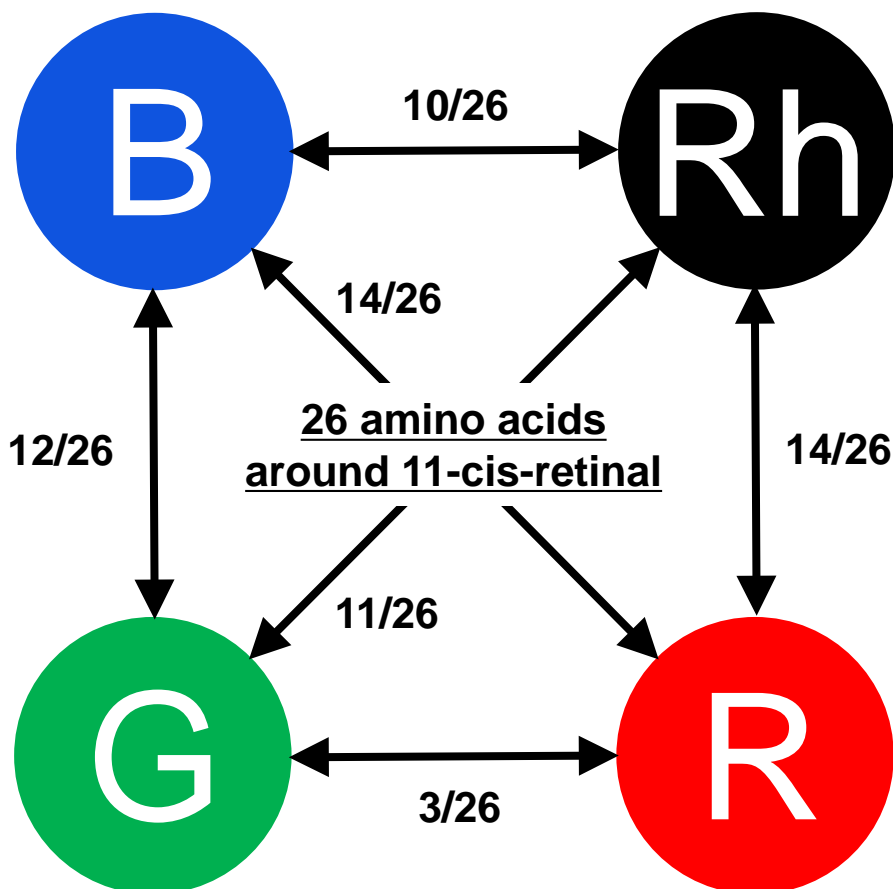

# Figure S2

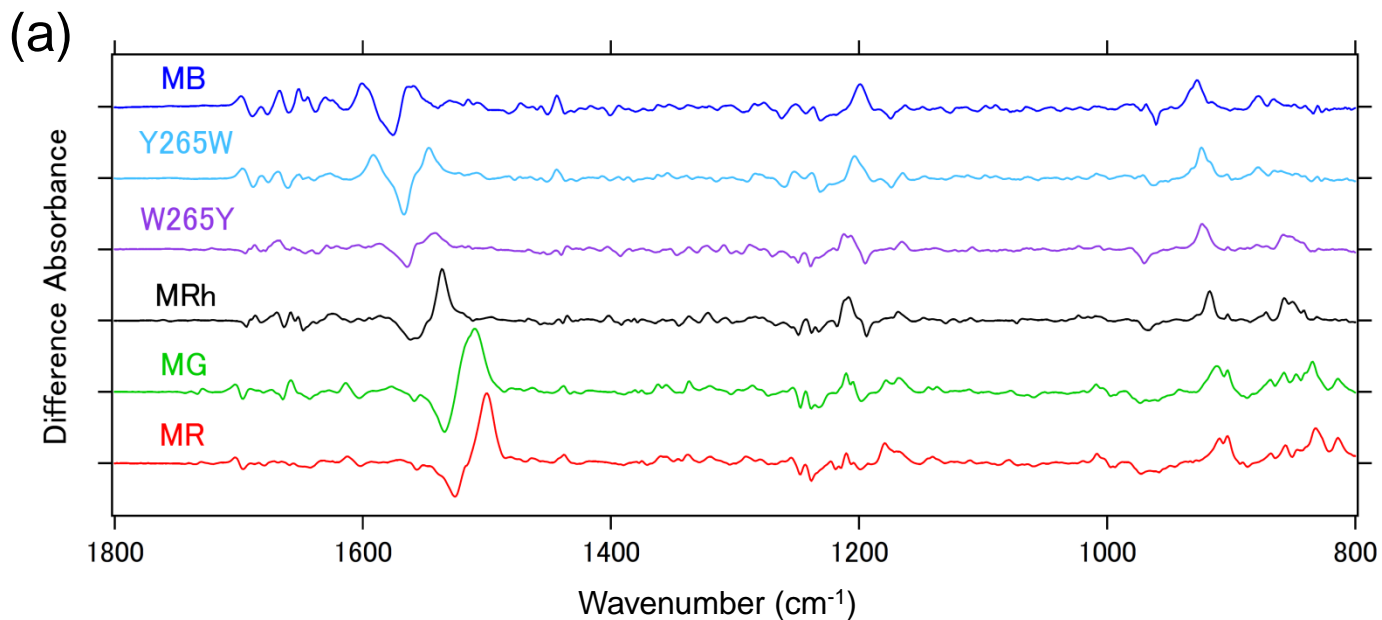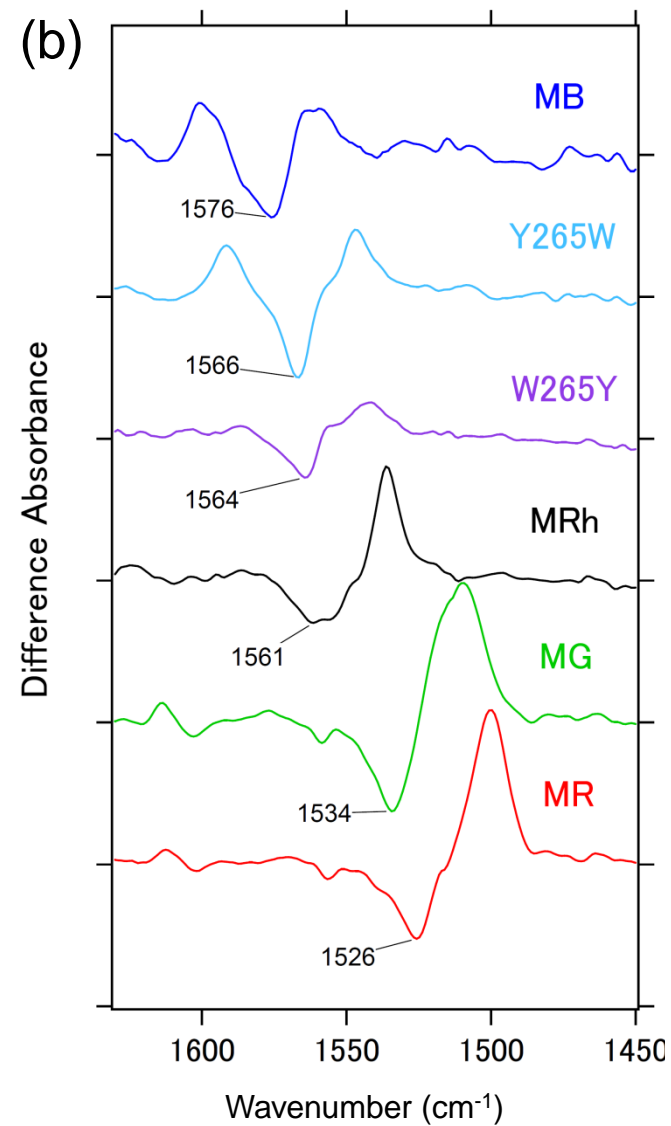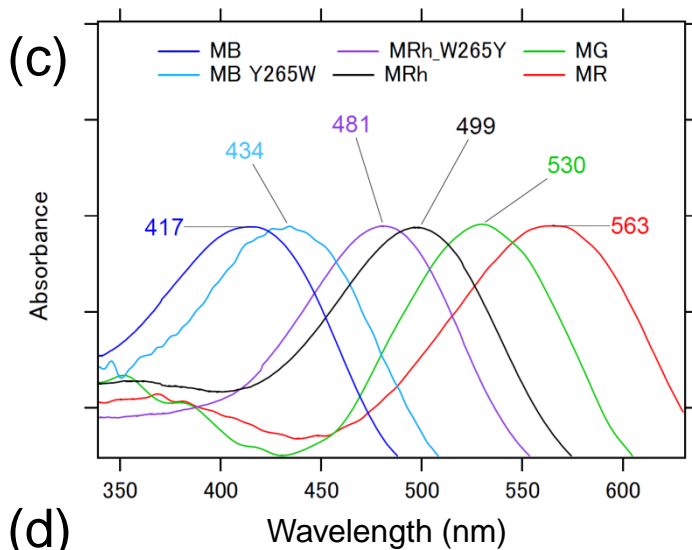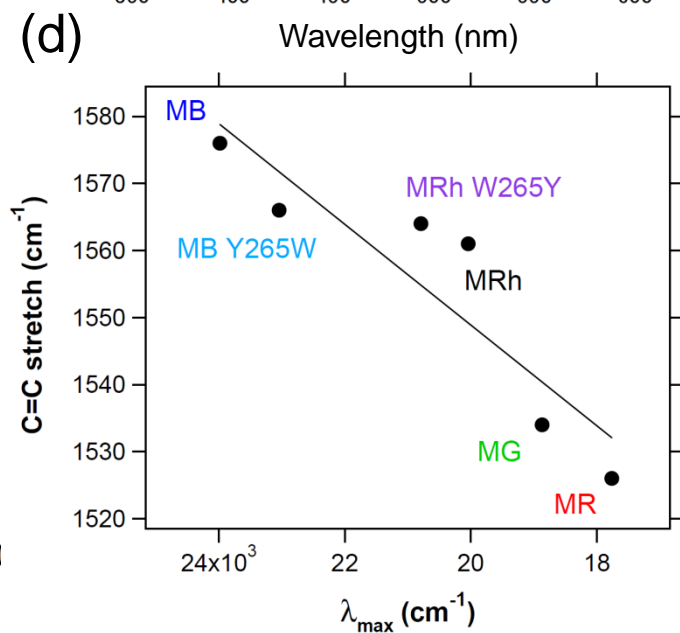

Figure S3

(a)

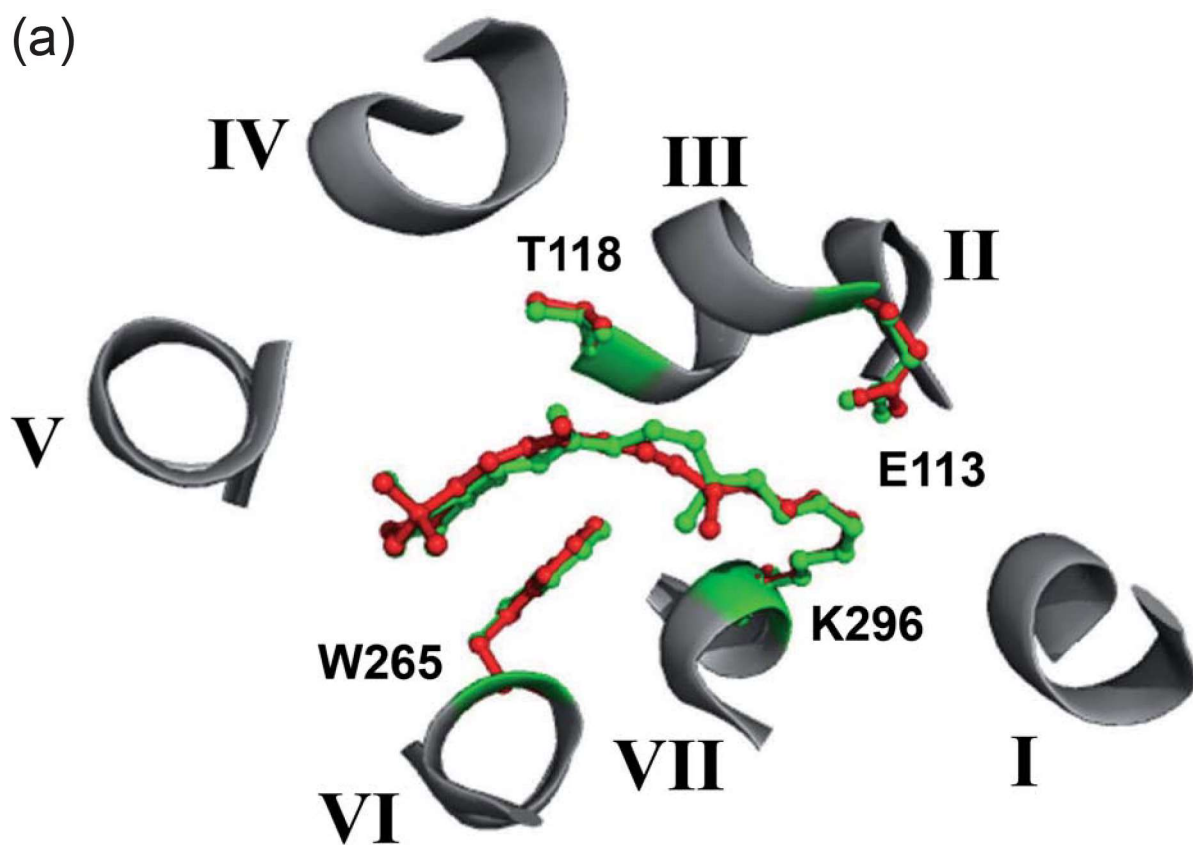

(b)

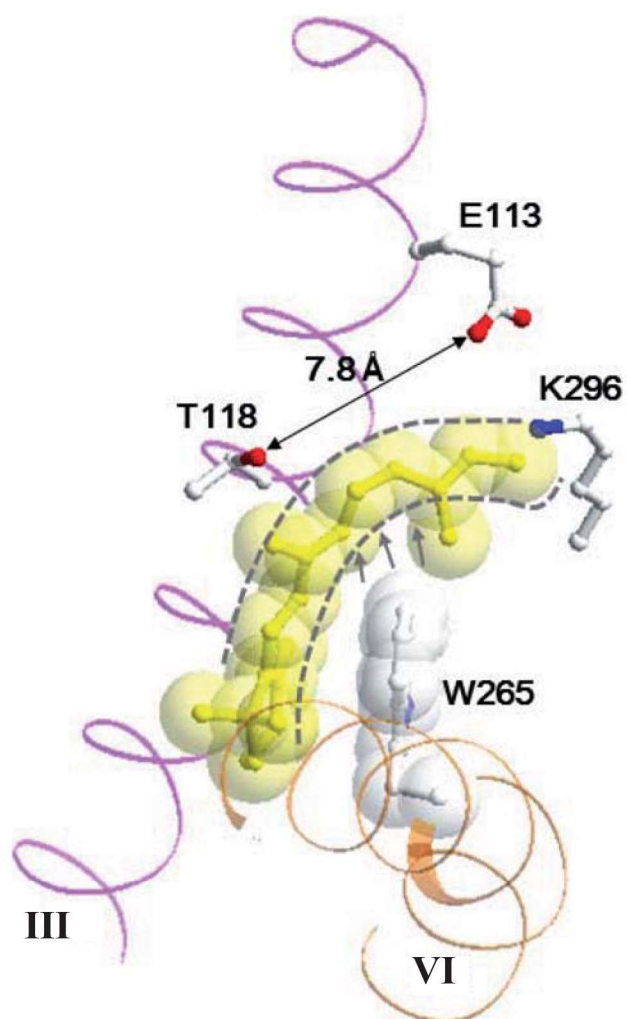

Figure S4

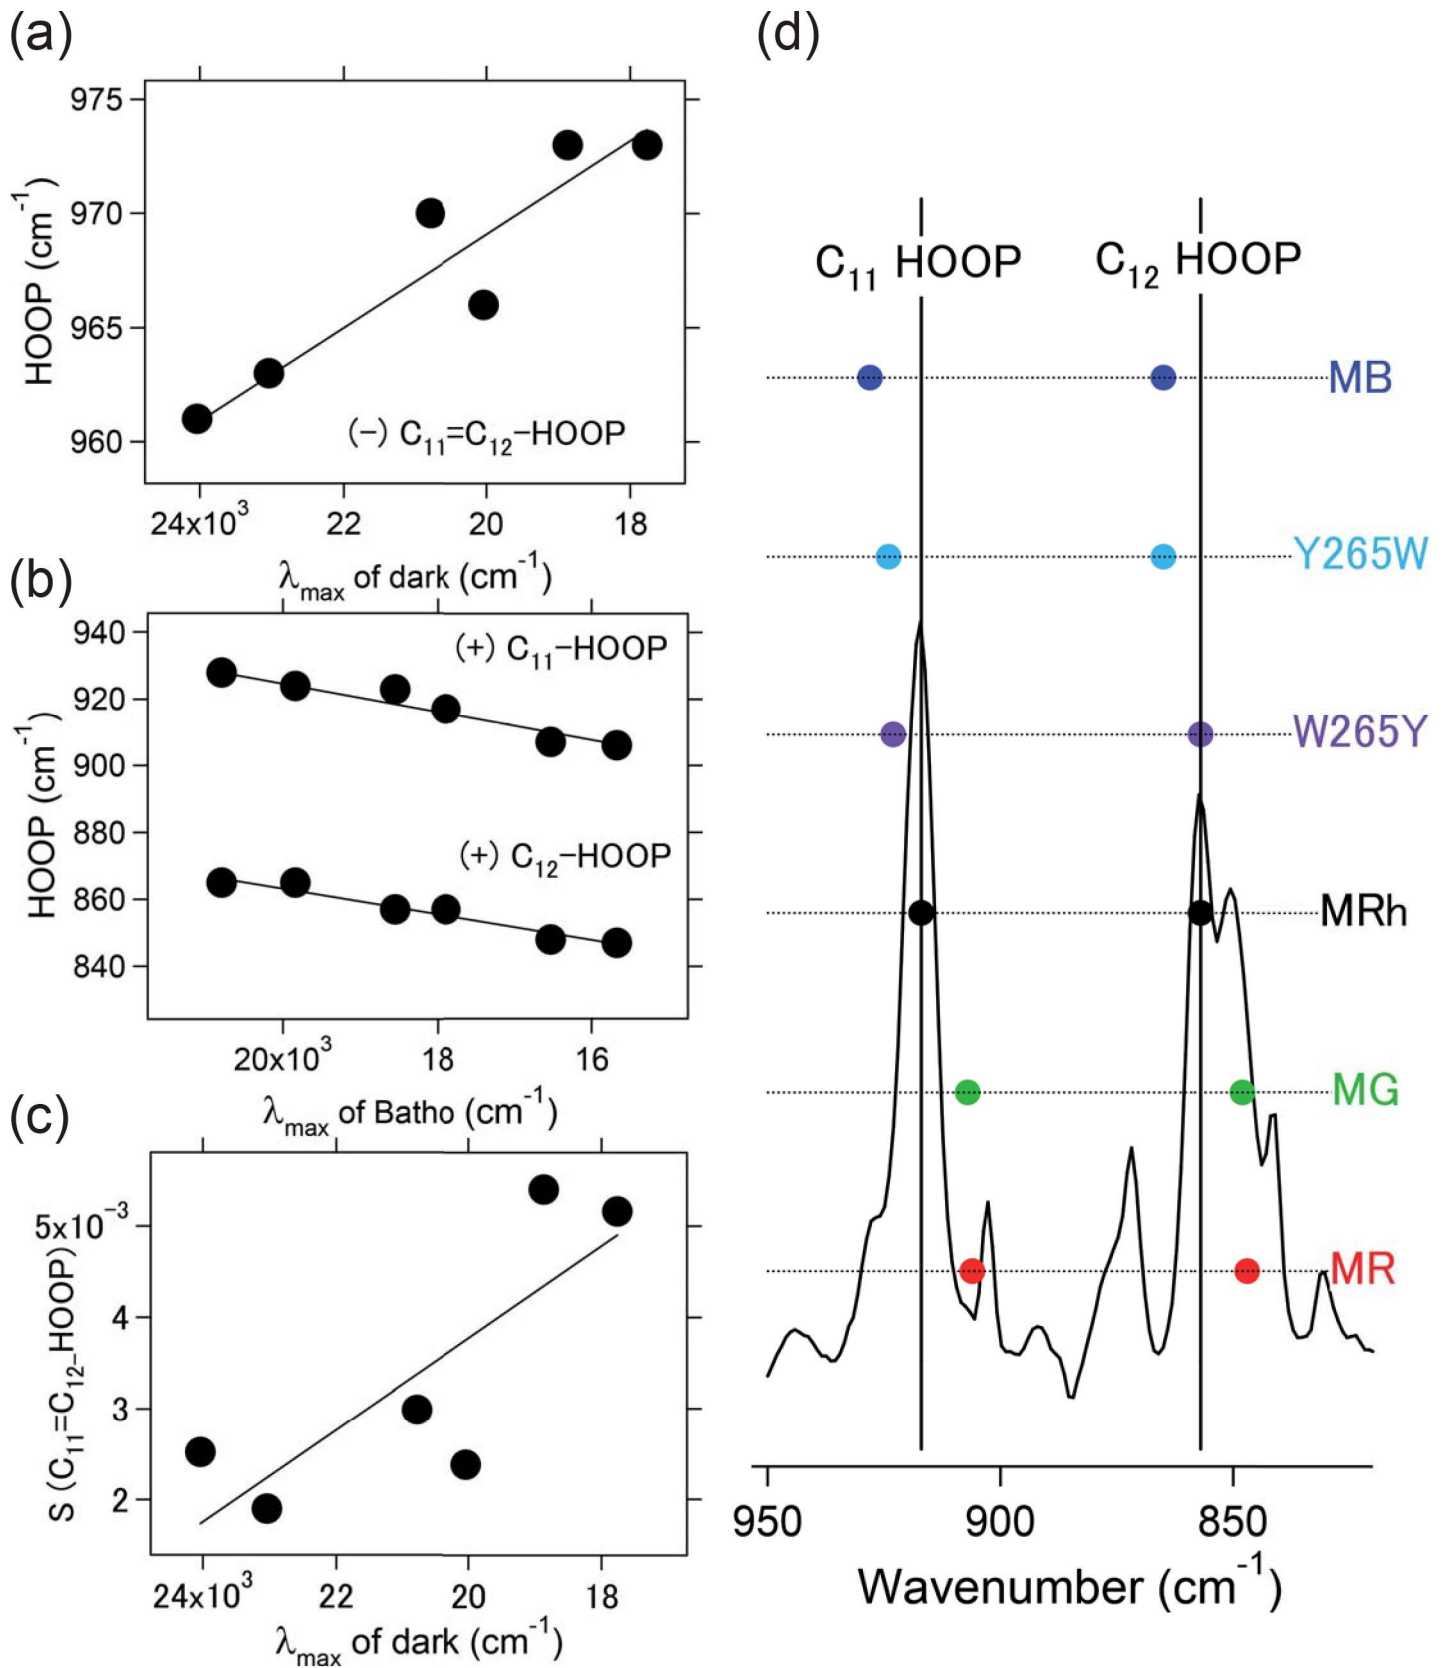



Figure S5

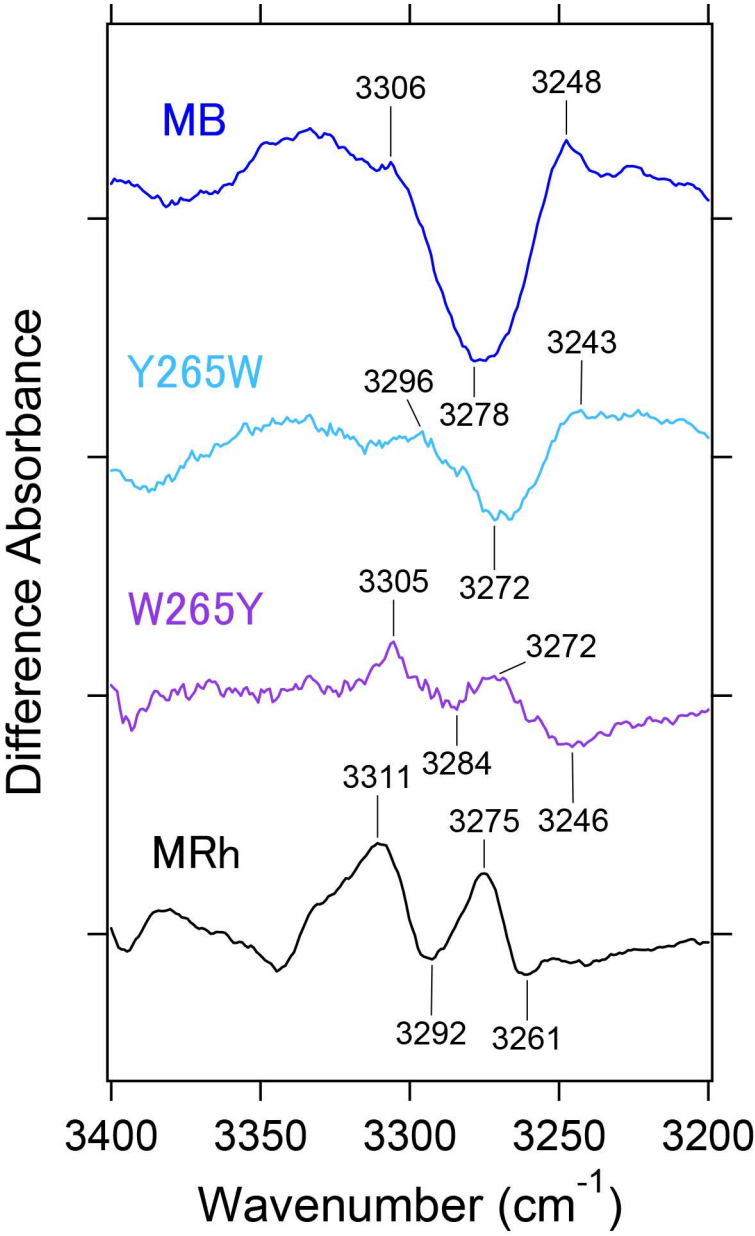

Figure S6

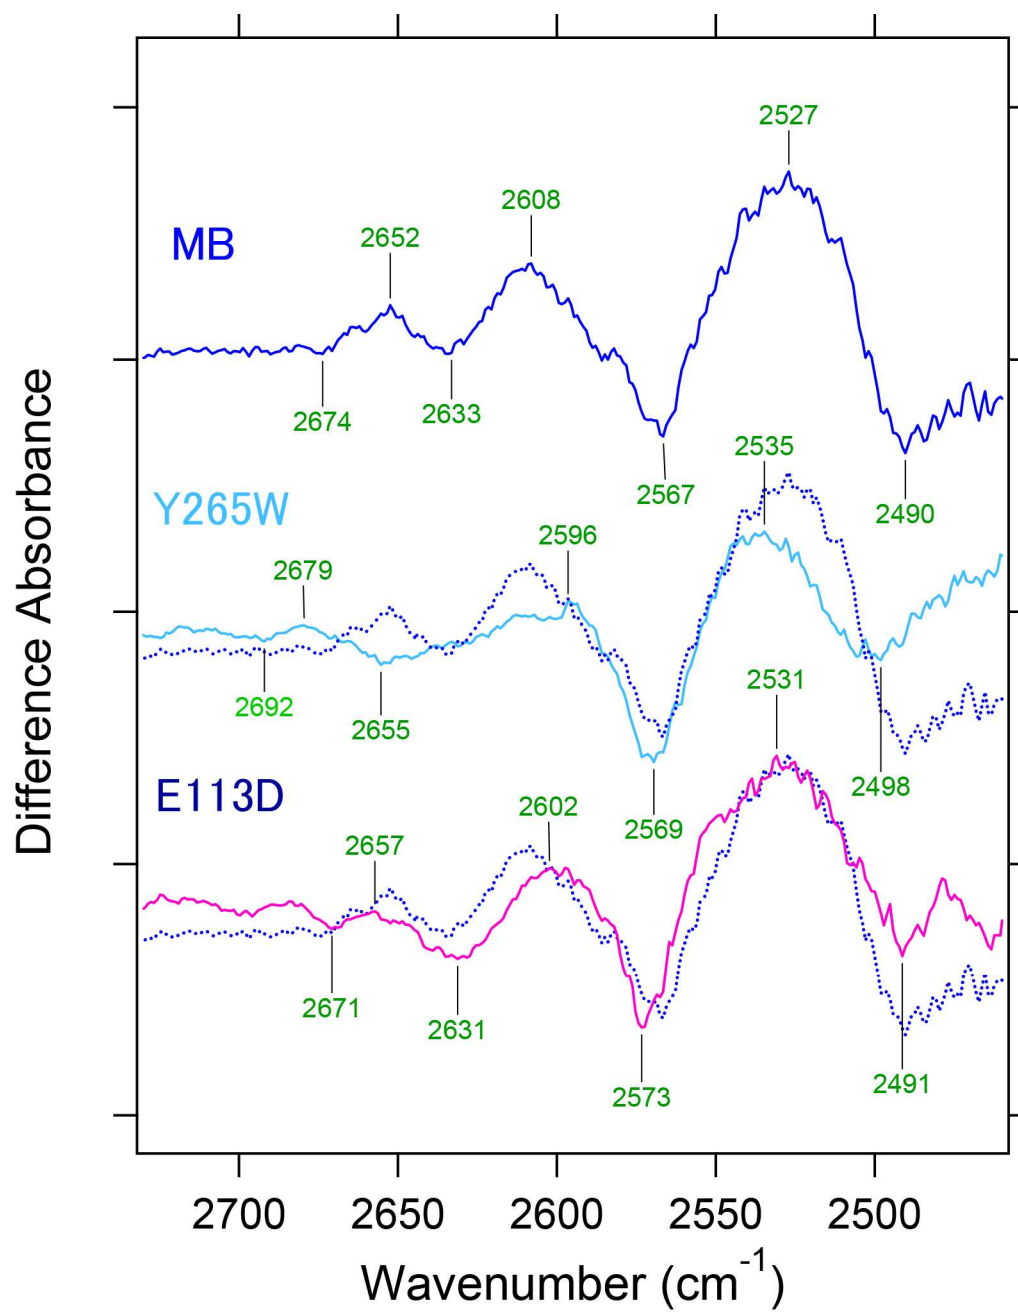

Figure S7

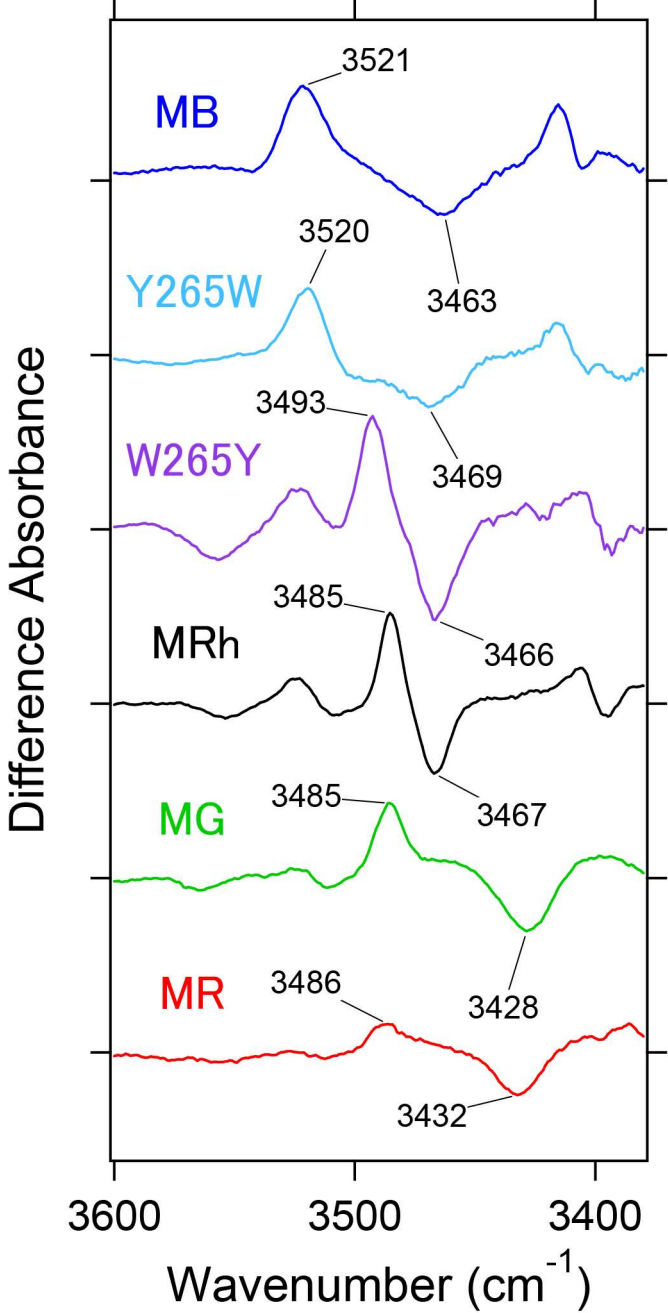

Figure S8

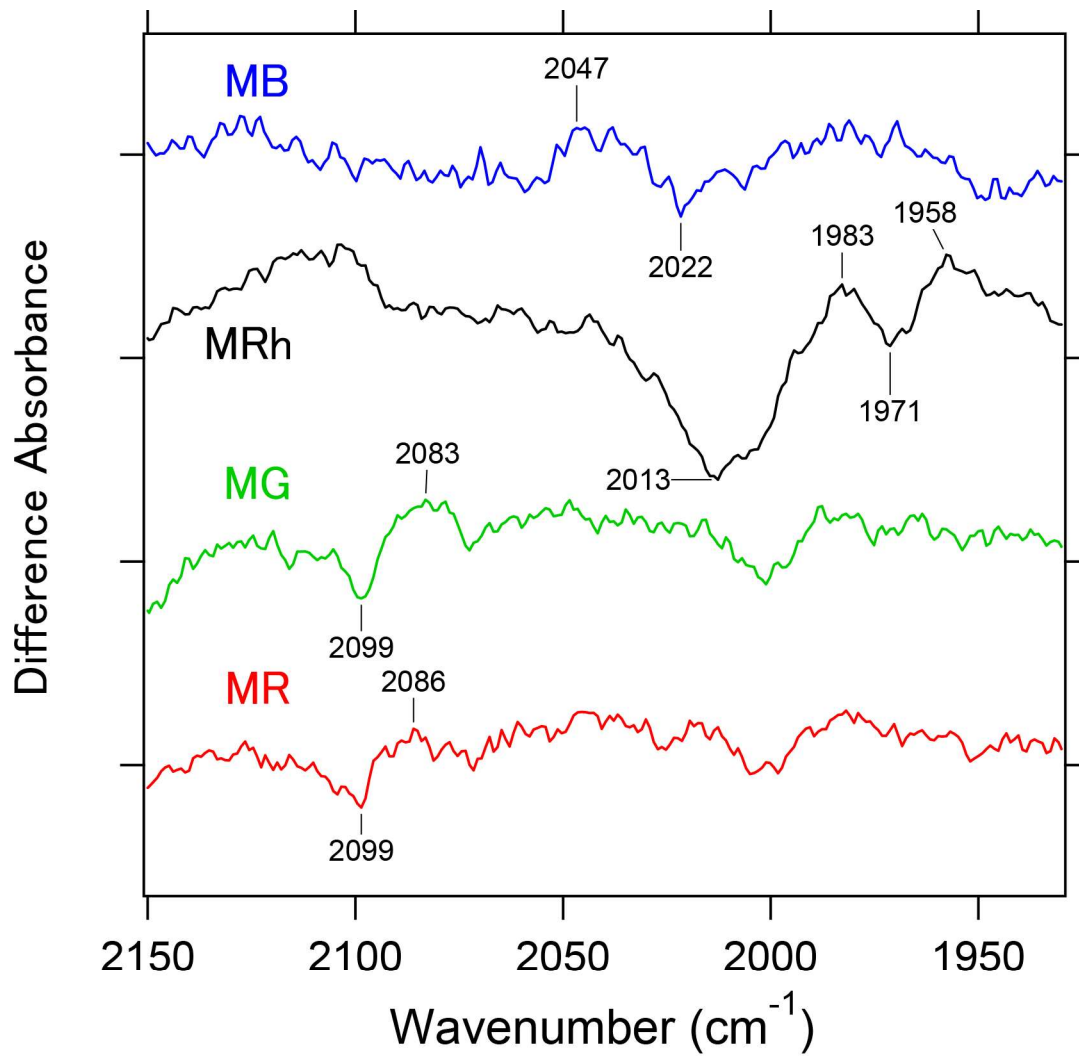

Supplement: 41598_2017_5177_MOESM1_ESM.pdf [file 41598_2017_5177_MOESM1_ESM.pdf]
